# Supplementary material
Source: Springer Nature journal article supplement (https://www.springermedizin.de/resource/supplementary/13075_2011_3163_MOESM7_ESM.pdf/9693882)

**A**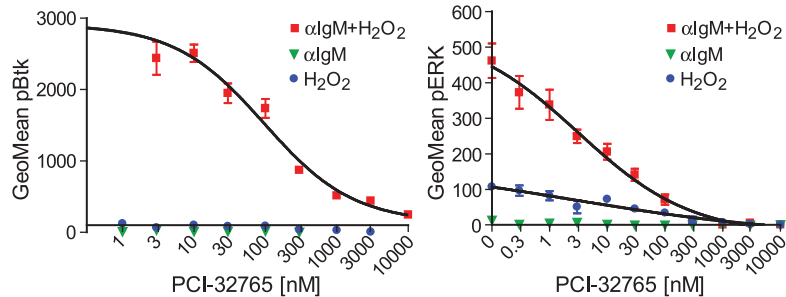**B**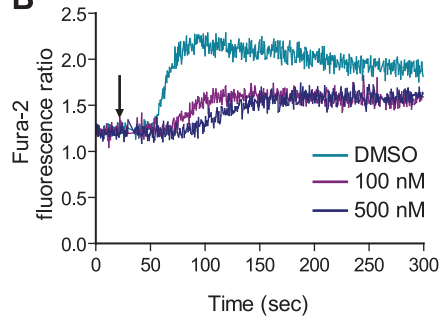**C**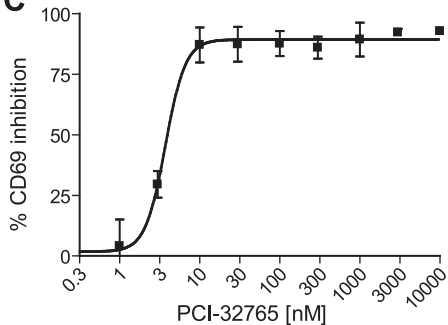**D**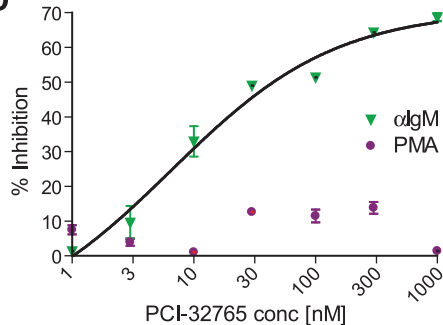

Supplement: MOESM7 [file 9693882]
